# Supplementary material
Source: HighWire-hosted journal article supplement (https://bmjopen.bmj.com/content/7/12/e019860)
Supplement: inline-supplementary-material-1 [file inline-supplementary-material-1.pdf]

## **Appendix: ICD codes used in the study**

**Pneumonia:** ICD-10: J12–J18 (excl. previous pneumonia episodes ICD-8: 480–486, 073 and 471)

The cohort included 14% with bacterial pneumonia (*Streptococcus pneumoniae*, *Haemophilus influenzae*, *Mycoplasma pneumoniae*, *Chlamydophila pneumoniae*, and Enterobacteriaceae), 22% with viral pneumonia (including adenovirus, respiratory syncytial virus, parainfluenza virus, metapneumonvirus, and unspecified viruses), while the agent was unspecified for 64% of the children.

### **Covariates**

**Immune deficiencies:** ICD-10: D80.0-D82.9

**Congenital malformations:** ICD-8: 74099-75999; ICD-10: Q00-99

**Down syndrome:** ICD-8: 75939, ICD-10: Q90

**Chest imaging: x-ray or CT scan:** UXRC00, UXCC75, UXCC77

**Cancer:** Lymphoid leukaemia (C91), myeloid leukaemia (C92), non-Hodgkin lymphoma (C82-85, and C90), Hodgkin lymphoma (C81), brain cancer (C71, C751-753, D330-332, D352-354, D430-432, and D443-445)
